# Supplementary material
Source: PubMed Central journal article supplement (PMC1764615)
Supplement: NIHMS14773-supplement-01.pdf [file NIHMS14773-supplement-01.pdf]

## Supplemental figure legends and figures

**FINAL MANUSCRIPT CELLMET-D-06-00034R1**

**First author:** Vianna

**Title:** Hypomorphic Mutation in *PGC1 $\beta$*  causes mitochondrial dysfunction and liver insulin resistance

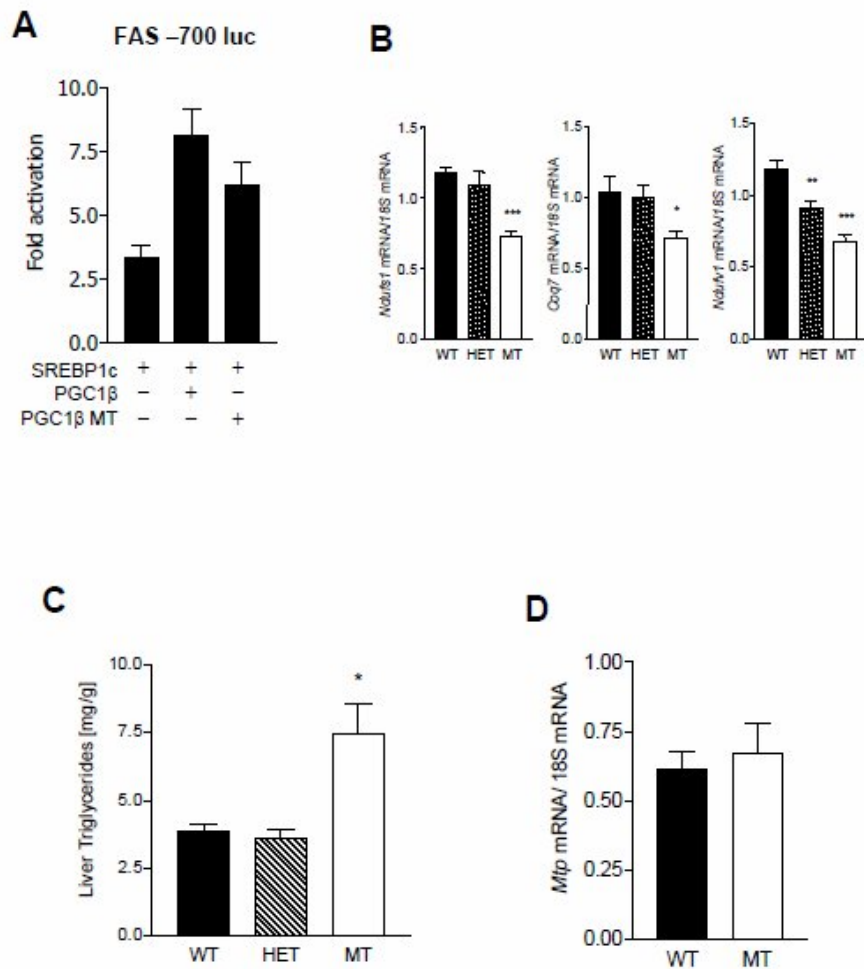

**Figure 1S. SREBP1c Coactivation, Gene expression, liver triglycerides, and MTP gene expression**

(A) Reduced SREBP1c coactivation by PGC1 $\beta$  mutant protein. Mouse H2.35 hepatoma cells were transiently cotransfected with FAS -700 luc reporter plasmid and with pCATCH-PGC1 $\beta$  or pCATCH-PGC1 $\beta$  mutant. pCMV- $\beta$ Gal was added for transfection efficiency normalization. Cells were harvested 48 hours after cotransfection and assayed for luciferase and  $\beta$ -galactosidase assays. The results represent the means  $\pm$  SEM of at least three independent experiments. (B)

Gene expression in heterozygous mice versus wild-type and homozygous mice. Quantitative PCR was performed on liver tissue from heterozygous mice to investigate the expression levels of genes found to be markedly abnormal in the liver of homozygous mice (see Figure 3). The mRNA content of specific genes was normalized to 18S mRNA content. Black bars represent WT; shaded bars represent HETs, white bars represent MT. Results are expressed as mean  $\pm$  SEM (n=6-10). (C) Increased triglycerides in the liver of homozygous PGC1 $\beta$  mice. Triglycerides were isolated from the liver of fed wild-type, heterozygous and homozygous PGC1 $\beta$  mice and measured with a commercially available kit. Results are expressed as mean  $\pm$  SEM (n=6). (D) Unaltered *Mtp* gene expression in liver. *Mtp* gene expression in liver tissue of wild-type and homozygous PGC1 $\beta$  mice was analyzed by q-PCR. The mRNA content was normalized to 18S mRNA content. Black bars represent WT; white bars represent MT. Results are expressed as mean  $\pm$  SEM (n=6).  $^{\wedge}$ P < 0.05;  $^{**}$ P < 0.01;  $^{***}$ P < 0.001.

## Vianna\_2S

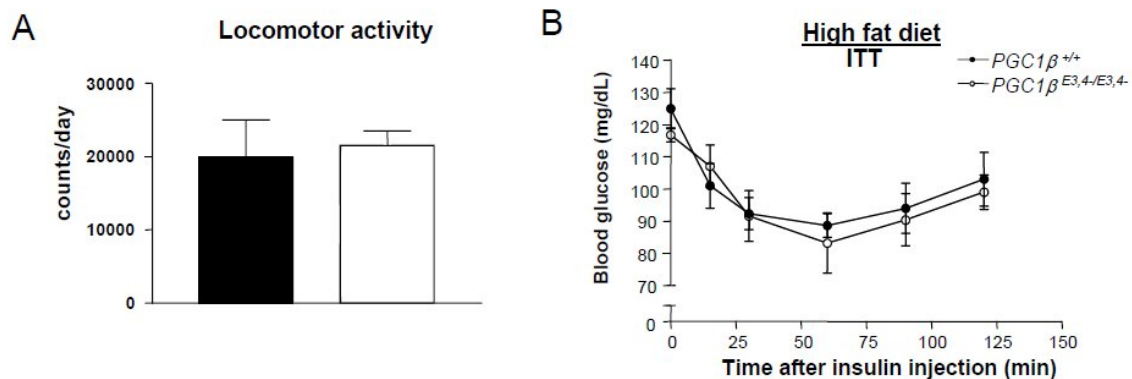

**Figure 2S. Locomotor activity and high fat fed mice-insulin tolerance test.**

(A) 24h locomotor activity measured with CLAMS. (B) Intraperitoneal insulin tolerance test (ITT). ITT was performed in high fat fed male  $Pgc1\beta^{+/+}$  and  $Pgc1\beta^{E3,4-/E3,4-}$  mice. Following 4 hours without food, mice were injected with insulin 1.5 U/Kg of body weight. Bars represent  $Pgc1\beta^{+/+}$  (black) and  $Pgc1\beta^{E3,4-/E3,4-}$  (white) mice. Results are expressed as mean  $\pm$  SEM (n=5-6).

Vianna\_3S

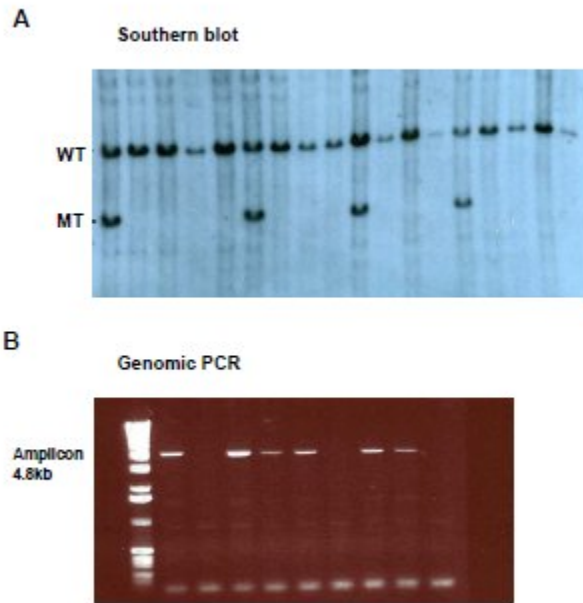

**Figure 3S. Screening of 129sv embryonic stem cell (ES) clones.**

(A) Southern blot analysis of ES clones. Clones that underwent 3' end homologous recombination contain both, wild-type (WT) and mutant DNA fragments (MT). (B) Genomic PCR analysis of ES clones. A 4.8kb amplicon is obtained using as template DNA of clones that underwent 5' end homologous recombination.

**Figure 4S**

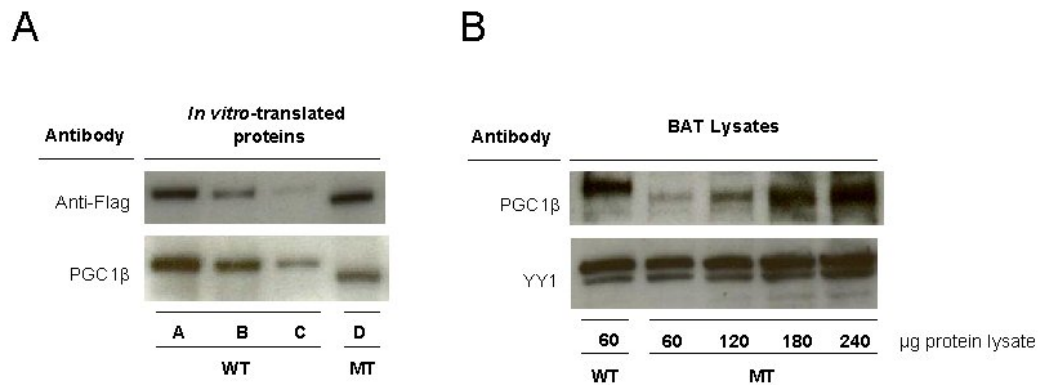

**Figure 4S. Western blot titration curves with *in vitro*-translated proteins and BAT lysates.**

(A) Decreasing amounts of *in vitro* translated FLAG-tagged wild-type and FLAG-tagged mutant PGC1 $\beta$  protein (lacking amino acids AA 85 to AA 195) were loaded (WT protein: lanes A = 10  $\mu$ l, B = 5  $\mu$ l, and C = 2.5  $\mu$ l; MT protein: lane D = 10  $\mu$ l). Anti-FLAG antibody was used to determine the amount of *in vitro* translated protein loaded. Based upon the signal detected by anti-FLAG antibody, the MT sample in lane D contains the same amount of PGC1 $\beta$  protein as the WT sample in lane A. However, based upon the signal detected by the PGC1 $\beta$  antibody, the MT signal in lane D was intermediate between the WT signal detected in lanes B (50% WT PGC1 $\beta$  protein compared with lane A) and C (25% of WT PGC1 $\beta$  protein compared with lane A). Based upon this (and other studies not shown), we estimate that the PGC1 $\beta$  antibody detects the MT protein with an efficiency of about 25-50%. (B) The expression of the wild-type and mutant PGC1 $\beta$  was assessed in BAT lysates. BAT lysate (60  $\mu$ g) from WT mice and increasing amounts of BAT protein lysates from MT mice (60, 120, 180, and 240  $\mu$ g; 2-, 3-, and 4-fold, respectively) were loaded on the gel. As indicated in the figure, 3- to 4-times greater amounts of BAT lysate from MT mice were required to generate a PGC1 $\beta$  signal similar to that seen in BAT lysate from WT mice. Given the reduced efficiency of the PGC1 $\beta$  antibody for detection of MT versus WT protein observed in panel A, this indicates that PGC1 $\beta$  protein is not reduced in MT mice.. All western blots were performed using the same antibody dilutions. Antiserum, raised against the N-terminal (AA 1-350) of the mouse PGC1 $\beta$  was used as the primary antibody. The specific signal for PGC1 $\beta$  was detected at ~160 kD in *Pgc1 $\beta$ <sup>+/+</sup>* BAT lysate. The PGC1 $\beta$  MT signal was detected at ~150 kD in *Pgc1 $\beta$ <sup>E3,4-/E3,4-</sup>* BAT lysate. Rabbit polyclonal antiserum against YY1 was used as loading control. Mouse monoclonal Anti-FLAG M2 antibody (Sigma) was used to detect the *in vitro* translated proteins.
